# Supplementary material for: Direct PCR Offers a Fast and Reliable Alternative to Conventional DNA Isolation Methods for Gut Microbiomes
Source: PubMed Central journal article supplement (PMC5698494; doi:10.1128/msystems.00132-17), 2017-11-21
Supplement: sys006172153sf3.pdf [file sys006172153sf3.pdf]

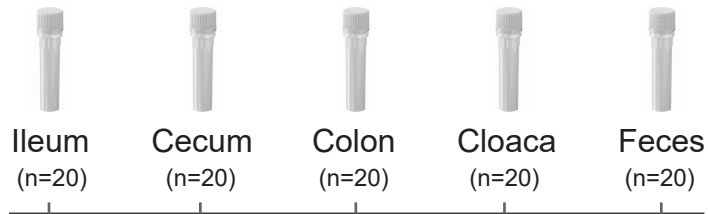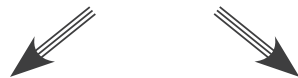

### Direct PCR (n=100)

Samples without  
replicates (n=60)

Extraction repl. 1  
(n=40)

Extraction repl. 2  
(n=40)

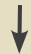

PCR replicate 1  
(n=10)

PCR replicate 2  
(n=10)

### DNA extraction (n=100)

Extraction repl. 2  
(n=40)

Extraction repl. 1  
(n=40)

Samples without  
replicates (n=60)

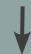

PCR replicate 2  
(n=10)

PCR replicate 1  
(n=10)
