# Supplementary material for: Direct PCR Offers a Fast and Reliable Alternative to Conventional DNA Isolation Methods for Gut Microbiomes
Source: PubMed Central journal article supplement (PMC5698494; doi:10.1128/msystems.00132-17), 2017-11-21

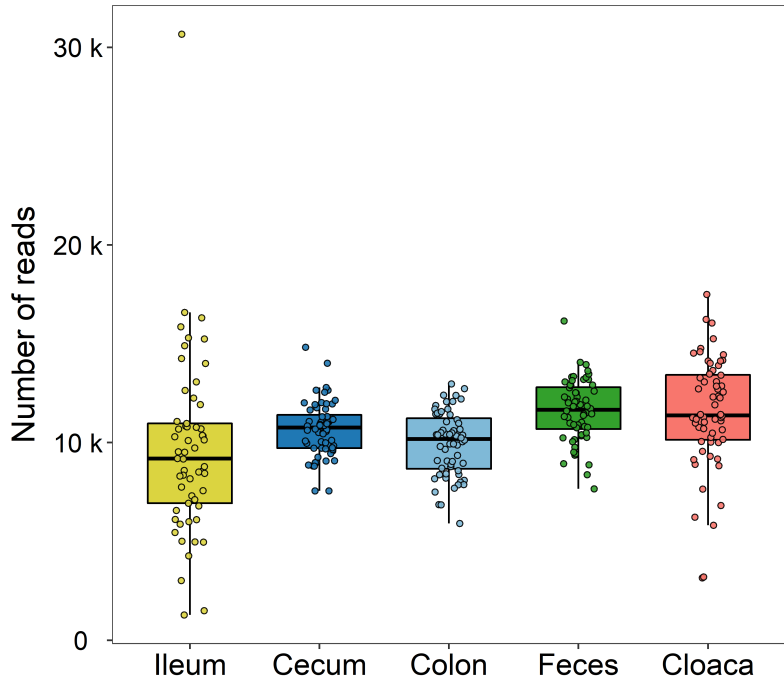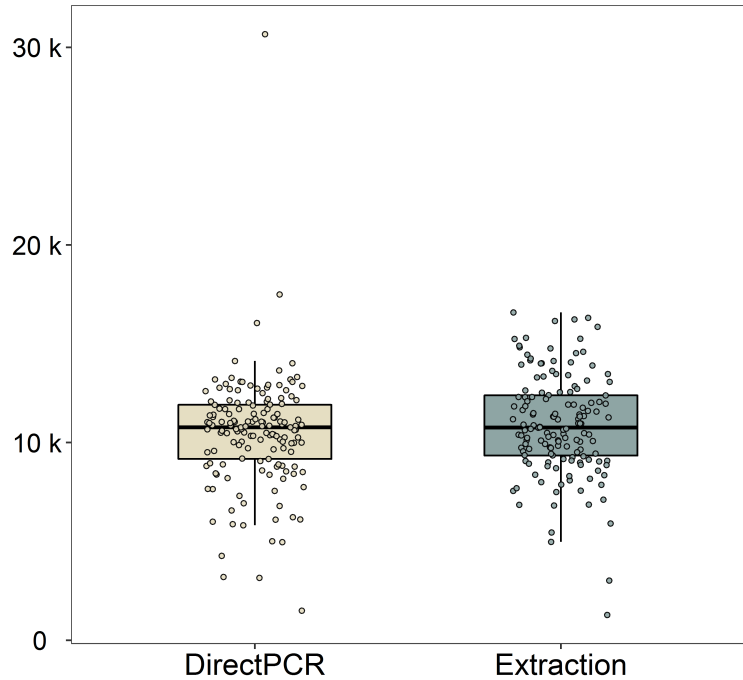

Supplement: sys006172153sf4.pdf [file sys006172153sf4.pdf]
